# Supplementary material
Source: ML conference proceedings conference paper supplement (https://openreview.net/forum?id=JMPOqoe4tl)
Supplement: supplementary_material [file attachment]

## A APPENDIX

### A.1 ROBUST MODELS

The experimental setup described in this paper (Section 3.1) utilizes pre-trained baseline and robust models obtained from RobustBench (Croce et al., 2021). The goal of RobustBench is to track the progress in adversarial robustness for  $\ell_\infty$ - and  $\ell_2$ -norm attacks since these are the most studied settings in the literature. We summarize in Table 5 the models we employed for testing the performance of  $\sigma$ -zero. Each entry in the table includes the label reference from RobustBench, the short name we assigned to the model, and the corresponding clean and robust accuracy under the specific threat model. The robustness of these models is evaluated against an ensemble of white-box and black-box attacks, specifically AutoAttack. We also include in our experiments models trained to be robust against  $\ell_1$ -sparse attacks, i.e., C3 (Croce & Hein, 2021) and C4 (Jiang et al., 2023), as well as two robust models trained to resist  $\ell_0$ -norm attacks, i.e., C11 (Zhong et al., 2024) and C12 (Zhong et al., 2024). Our experimental setup is designed to encompass a wide range of model architectures and defensive techniques, ensuring a comprehensive and thorough performance evaluation of the considered attacks.

Table 5: Summary of Robustbench models used in our experiments. For each model, we report its reference label in Robustbench, its threat model, and the corresponding clean and robust accuracy.

| Dataset  | Reference                     | Model                         | Threat model             | Clean accuracy % | Robust accuracy % |
|----------|-------------------------------|-------------------------------|--------------------------|------------------|-------------------|
| CIFAR-10 | Carmon2019Unlabeled           | C1 (Carmon et al., 2019)      | $\ell_\infty$            | 89.69            | 59.53             |
|          | Augustin2020Adversarial       | C2 (Augustin et al., 2020)    | $\ell_2$                 | 91.08            | 72.91             |
|          | Standard                      | C5 (Croce et al., 2021)       | -                        | 94.78            | 0                 |
|          | Gowal2020Uncovering           | C6 (Gowal et al., 2021)       | $\ell_2$                 | 90.90            | 74.50             |
|          | Engstrom2019Robustness        | C7 (Engstrom et al., 2019)    | $\ell_\infty$ - $\ell_2$ | 87.03 - 90.83    | 49.25 - 69.24     |
|          | Chen2020Adversarial           | C8 (Chen et al., 2020)        | $\ell_\infty$            | 86.04            | 51.56             |
|          | Xu2023Exploring_WRN-28-10     | C9 (Xu et al., 2023)          | $\ell_\infty$            | 93.69            | 63.89             |
|          | Addepalli2022Efficient_RN18   | C10 (Addepalli et al., 2022)  | $\ell_\infty$            | 85.71            | 52.48             |
|          | Standard_R18                  | I1 (He et al., 2015)          | -                        | 76.52            | 0                 |
|          | Engstrom2019Robustness        | I2 (Engstrom et al., 2019)    | $\ell_\infty$            | 62.56            | 29.22             |
| ImageNet | Hendrycks2020Many             | I3 (Hendrycks et al., 2021)   | $\ell_\infty$            | 76.86            | 52.90             |
|          | Debenedetti2022Light_XCiT-S12 | I4 (Debenedetti et al., 2023) | $\ell_\infty$            | 72.34            | 41.78             |
|          | Wong2020Fast                  | I5 (Wong et al., 2020)        | $\ell_\infty$            | 55.62            | 26.24             |
|          | Salman2020Do_R18              | I6 (Salman et al., 2020)      | $\ell_\infty$            | 64.02            | 34.96             |
|          | Peng2023Robust                | I7 (Peng et al., 2023)        | $\ell_\infty$            | 73.44            | 48.94             |
|          | Mo2022When_Swin-B             | I8 (Mo et al., 2022)          | $\ell_\infty$            | 74.66            | 38.30             |

### A.2 $\sigma$ -ZERO: HYPERPARAMETER ROBUSTNESS

To assess the strength and potential limitations of our proposed attack, we conducted an ablation study on its key hyperparameters,  $\tau_0$ ,  $\sigma$ , and  $t$ .

The parameter  $\tau_0$  governs the initial tolerance threshold in Algorithm 1, which induces sparsity within the adversarial perturbation. The parameter  $\sigma$  defines the approximation quality of  $\hat{\ell}_0$  in Eq. (7) compared to the actual  $\ell_0$  function. Our ablation study, depicted in Figure 3, involved two distinct models: C10 (top row) and I1 (bottom row). We executed the attack on 1000 randomly selected samples from each dataset and recorded the ASR at different perturbation budgets  $k$  and the median  $\ell_0$  norm of the resulting adversarial perturbations. We observe a significant robustness of  $\sigma$ -zero with respect to these two hyperparameters; in particular: (i) the choice of the initial value of  $\tau_0$  exerts negligible influence on the ultimate outcome, given that the parameter dynamically adapts throughout the optimization process; and (ii) the selection of  $\sigma$  is not particularly challenging, especially when incorporating the sparsity projection operator.

We also conducted an ablation study on the sparsity threshold adjustment factor  $t$  used to adaptively update  $\tau$ . In the following we keep the default values for  $\tau_0 = 0.3$  and  $\sigma = 10^{-3}$ . We executed the attack on 1000 randomly selected samples against C3 and C4 models and recorded the  $ASR_{50}$  and the median  $\ell_0$  norm of the resulting adversarial perturbations. In Figure 4, we once again observe the robustness of  $\sigma$ -zero to this parameter, yielding similar and effective results when  $t \leq 10^{-1}$ .

Overall, the ablation study revealed consistent trends across the distinct models and datasets. In all cases, we identified a broad parameter configuration range where our attack maintained robustness to

|          | ASR <sub>24</sub> |      |      |      |      |      | ASR <sub>50</sub> |      |      |      |      |      | ASR <sub>100</sub> |      |      |      |       |       | $\tilde{\ell}_0$ |      |      |      |      |      |
|----------|-------------------|------|------|------|------|------|-------------------|------|------|------|------|------|--------------------|------|------|------|-------|-------|------------------|------|------|------|------|------|
| 0.1      | 66.2              | 67.5 | 68.3 | 69.6 | 69.2 | 69.8 | 79.7              | 80.8 | 83.7 | 84.3 | 84.7 | 85.4 | 89.8               | 91.3 | 93.4 | 95.4 | 97.2  | 96.7  | 14.0             | 13.0 | 13.0 | 13.0 | 13.0 | 12.0 |
| 0.01     | 73.2              | 72.5 | 72.1 | 73.5 | 73.7 | 74.7 | 93.1              | 92.2 | 92.5 | 93.8 | 95.2 | 96.1 | 99.7               | 99.8 | 99.8 | 99.7 | 100.0 | 100.0 | 12.0             | 12.5 | 12.0 | 12.0 | 12.0 | 12.0 |
| 0.001    | 72.5              | 72.5 | 72.6 | 73.2 | 74.0 | 74.5 | 92.7              | 92.0 | 92.5 | 93.5 | 95.3 | 95.5 | 99.9               | 99.7 | 99.7 | 99.8 | 99.9  | 100.0 | 12.0             | 13.0 | 13.0 | 12.0 | 12.0 | 12.0 |
| 0.0001   | 72.5              | 72.5 | 72.8 | 73.3 | 73.6 | 74.8 | 92.2              | 92.2 | 92.4 | 93.9 | 95.2 | 95.8 | 99.5               | 99.8 | 99.7 | 99.7 | 100.0 | 100.0 | 13.0             | 13.0 | 12.0 | 12.0 | 12.0 | 12.0 |
| 1e-05    | 72.8              | 73.1 | 72.8 | 73.4 | 74.0 | 74.7 | 93.0              | 92.5 | 92.7 | 93.0 | 94.9 | 96.0 | 99.7               | 99.6 | 99.8 | 99.7 | 100.0 | 100.0 | 12.0             | 12.0 | 13.0 | 12.0 | 12.0 | 12.0 |
| 1e-06    | 72.5              | 72.0 | 72.2 | 73.4 | 74.0 | 74.7 | 92.6              | 92.2 | 92.8 | 93.4 | 95.0 | 96.2 | 99.7               | 99.8 | 99.8 | 99.8 | 99.9  | 100.0 | 13.0             | 13.0 | 13.0 | 12.0 | 12.0 | 12.0 |
| 1e-07    | 72.0              | 72.4 | 71.7 | 72.7 | 73.2 | 73.8 | 92.4              | 92.0 | 92.5 | 93.2 | 94.2 | 95.5 | 99.7               | 99.7 | 99.5 | 99.8 | 100.0 | 100.0 | 13.0             | 13.0 | 13.0 | 13.0 | 13.0 | 13.0 |
| $\tau_0$ |                   |      |      |      |      |      |                   |      |      |      |      |      |                    |      |      |      |       |       |                  |      |      |      |      |      |
|          | 0.0               | 0.1  | 0.2  | 0.3  | 0.4  | 0.5  | 0.0               | 0.1  | 0.2  | 0.3  | 0.4  | 0.5  | 0.0                | 0.1  | 0.2  | 0.3  | 0.4   | 0.5   | 0.0              | 0.1  | 0.2  | 0.3  | 0.4  | 0.5  |
| 0.1      | 83.2              | 83.7 | 84.8 | 83.8 | 84.3 | 84.3 | 94.3              | 94.5 | 94.9 | 95.0 | 95.2 | 95.7 | 96.7               | 97.7 | 98.3 | 99.1 | 98.8  | 98.8  | 5.0              | 5.0  | 5.0  | 5.0  | 5.0  | 5.0  |
| 0.01     | 82.7              | 81.8 | 82.7 | 83.1 | 83.4 | 82.7 | 96.1              | 95.8 | 95.7 | 95.6 | 95.9 | 95.9 | 99.5               | 99.7 | 99.7 | 99.7 | 99.7  | 99.8  | 5.0              | 5.0  | 5.5  | 5.0  | 6.0  | 5.0  |
| 0.001    | 83.0              | 83.0 | 83.0 | 83.4 | 82.9 | 83.2 | 96.5              | 95.5 | 96.1 | 95.4 | 95.6 | 96.0 | 99.7               | 99.7 | 99.8 | 99.7 | 99.5  | 99.7  | 5.0              | 6.0  | 6.0  | 6.0  | 5.0  | 5.0  |
| 0.0001   | 83.2              | 83.0 | 83.0 | 83.1 | 82.8 | 83.3 | 96.3              | 96.0 | 96.1 | 95.7 | 96.0 | 95.9 | 99.6               | 99.7 | 99.7 | 99.7 | 99.6  | 99.8  | 5.0              | 6.0  | 6.0  | 5.0  | 5.0  | 5.0  |
| 1e-05    | 82.8              | 82.4 | 83.2 | 82.2 | 82.7 | 83.6 | 95.8              | 95.2 | 96.3 | 95.8 | 96.0 | 95.5 | 99.6               | 99.7 | 99.7 | 99.5 | 99.8  | 99.8  | 6.0              | 6.0  | 5.0  | 6.0  | 5.0  | 6.0  |
| 1e-06    | 83.0              | 82.9 | 81.9 | 82.7 | 83.0 | 82.8 | 96.0              | 95.8 | 96.1 | 95.7 | 95.8 | 95.9 | 99.7               | 99.6 | 99.7 | 99.7 | 99.8  | 99.8  | 5.0              | 5.5  | 6.0  | 6.0  | 5.0  | 6.0  |
| 1e-07    | 75.1              | 75.8 | 77.3 | 75.8 | 74.7 | 75.3 | 93.6              | 93.5 | 94.1 | 93.7 | 93.8 | 93.3 | 99.4               | 99.0 | 99.3 | 99.6 | 99.4  | 99.3  | 7.0              | 7.0  | 7.0  | 7.0  | 7.0  | 7.0  |
| $\tau_0$ |                   |      |      |      |      |      |                   |      |      |      |      |      |                    |      |      |      |       |       |                  |      |      |      |      |      |
|          | 0.0               | 0.1  | 0.2  | 0.3  | 0.4  | 0.5  | 0.0               | 0.1  | 0.2  | 0.3  | 0.4  | 0.5  | 0.0                | 0.1  | 0.2  | 0.3  | 0.4   | 0.5   | 0.0              | 0.1  | 0.2  | 0.3  | 0.4  | 0.5  |

Figure 3: Ablation study on  $\sigma$  (y-axis) and  $\tau_0$  (x-axis) for CIFAR-10 C10 (top-row), ImageNet I1, (bottom-row). For each combination, we report the attack success rate at different  $k$  and the median  $\ell_0$  perturbation value.

the hyperparameter selection, making hyperparameter optimization for the attacker a swift task. This robustness is further evidenced by the results presented in the experimental comparisons, where our attack consistently outperforms competing attacks even with a shared hyperparameter configuration across all models.

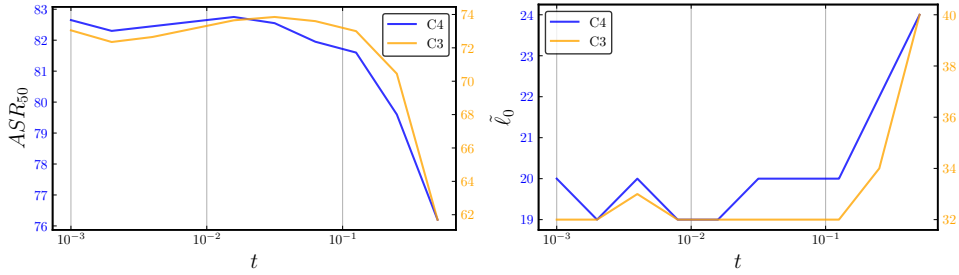

Figure 4: Ablation study on  $t$  for CIFAR-10 C3 and C4. For each, we report the attack success rate at the 50 feature budget (*left*) and the median  $\ell_0$  norm of the adversarial perturbation (*right*).

## B ADDITIONAL EXPERIMENTAL COMPARISONS

### B.1 COMPARISONS WITH MINIMUM-NORM ATTACK

In our experimental setup, we also consider a reduced number of queries, to test whether the attack can also run faster while remaining effective. We thus replicate our experimental comparison involving  $\sigma$ -zero and state-of-the-art sparse attacks while restricting the number of steps to  $N = 100$ . The results are summarized in Tables 7-9. Compared to the results with  $N = 1000$  steps reported in Tables 1 and 6, the ASR of most competitive attacks decreases, while  $\sigma$ -zero remains effective by consistently reaching an ASR of 100%. This shows that  $\sigma$ -zero remains an effective, reliable and fast approach to crafting minimum-norm attacks even with reduced query budgets.

## B.2 COMPARISONS WITH FIXED-BUDGET ATTACKS

Fixed-budget attacks, i.e., Sparse-RS (Croce et al., 2022), PGD- $\ell_0$  (Croce & Hein, 2019), and Sparse-PGD (Zhong et al., 2024), have been designed to generate sparse adversarial perturbations given a fixed-budget  $k$ , therefore, drawing comparisons with minimum-norm attacks is not a straightforward task. Specifically, in their threat model, the attacker imposes a maximum limit on the number of perturbed features, and the attack then outputs the adversarial example that minimizes the model’s confidence in predicting the true label of the sample. However, since the fixed-budget threat model differs from the minimum-norm scenario we consider in this paper, which does not assume a maximum norm value  $k$ , we evaluate  $\sigma$ -zero in a fixed-budget fashion by discarding all adversarial perturbations that exceed  $k$ . Furthermore, as for fixed-budget attack, we let  $\sigma$ -zero to leverage the input parameter  $k$  to early stop the optimization procedure and reduce the number of consumed queries to the target model. Throughout this evaluation, the number of steps taken by Sparse-RS is always doubled compared to the other two white-box attacks, as it does not utilize the backward pass employed by the others. The main paper reports to this end an evaluation of  $\sigma$ -zero in a fixed-budget approach (cf. Tables 3-4). The remaining experiments, involving additional models for CIFAR-10 and ImageNet, are reported in Tables 10-11. Furthermore, to explore the effects of increased iterations on convergence and success rate, we increased the number of iterations up to  $N = 10000$  (Tables 12-15), while always doubling the iterations for Sparse-RS. These additional experiments cover the three datasets MNIST, CIFAR-10, and ImageNet, 18 distinct models, and various feature budgets. The results again affirm that,  $\sigma$ -zero consistently outperforms competing approaches or synergizes well with them for a comprehensive robustness assessment.

## B.3 ROBUSTNESS EVALUATION CURVES

We provide robustness evaluation curves for fixed-budget attacks on a CIFAR-10 model (C3), running each attack multiple times across various perturbation budgets  $k$ . The number of iterations is set to  $N = 1000$  and  $N = 5000$ , with Sparse-RS allocating twice the iterations due to its reliance solely on forward passes. The results, depicted in Figure 5, demonstrates that  $\sigma$ -zero consistently outperforms fixed-budget attacks across all perturbation budgets  $k$ . Additionally, we present in Figs. 6-7 the robustness evaluation curves depicting the performance of minimum-norm  $\ell_0$ -attacks against all the models analyzed in our paper. These findings reinforce our experimental analysis, explicitly demonstrating that the  $\sigma$ -zero attack consistently achieves higher values of ASR while employing smaller  $\ell_0$ -norm perturbations compared to alternative attacks.

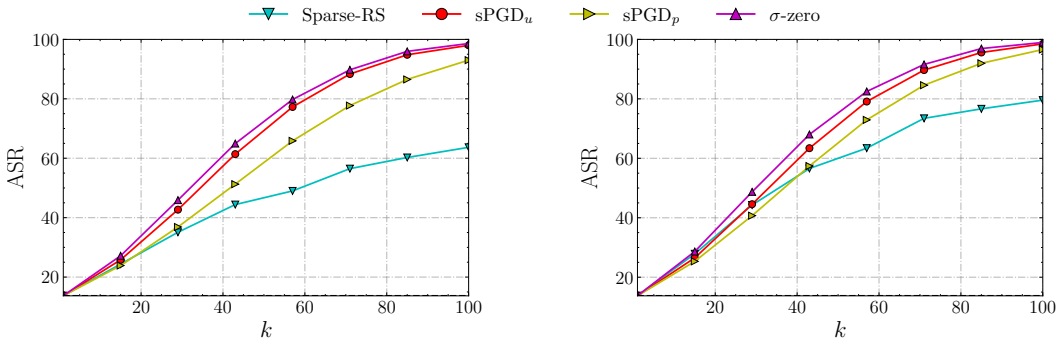

Figure 5: Robustness evaluation curves for fixed-budget attacks on C3. For each budget level  $k$ , each attack has been run with 1000 iterations (left-most plot) and 5000 iterations (right-most plot). Sparse-RS has been run with double the iterations as it relies solely on forward calls.

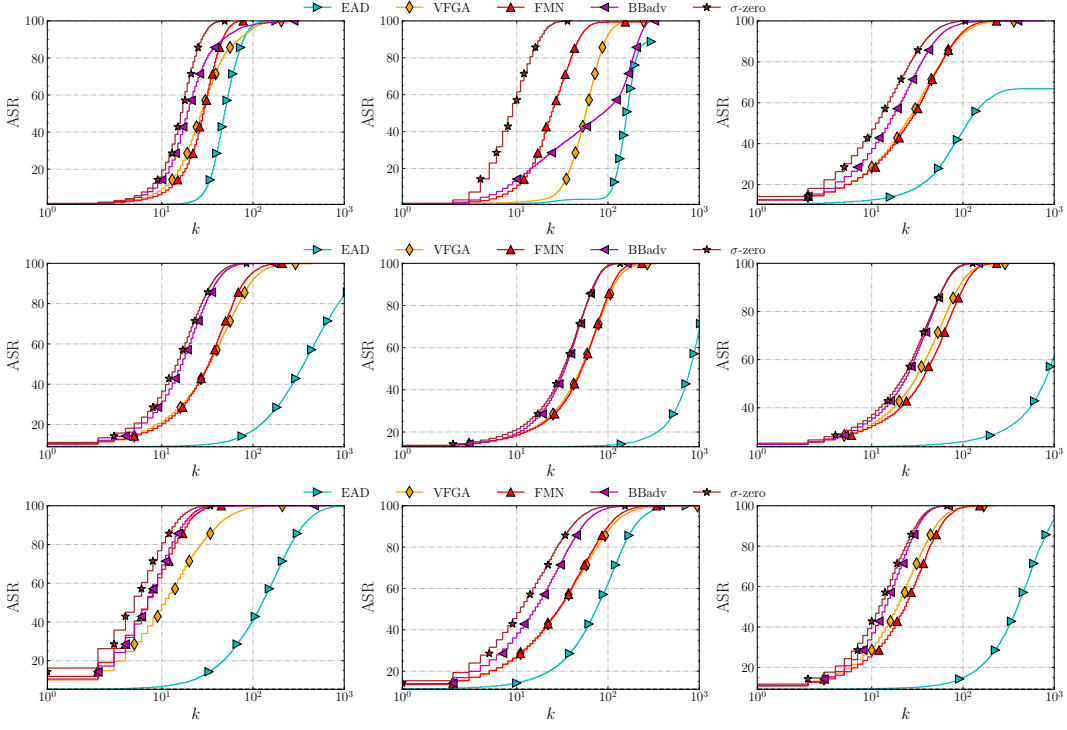

Figure 6: From the leftmost to the rightmost we report the robustness evaluation curves for M1, M2, C1 (top-row), C2, C3, C4 (middle-row) and C5, C6, C7 (bottom-row).

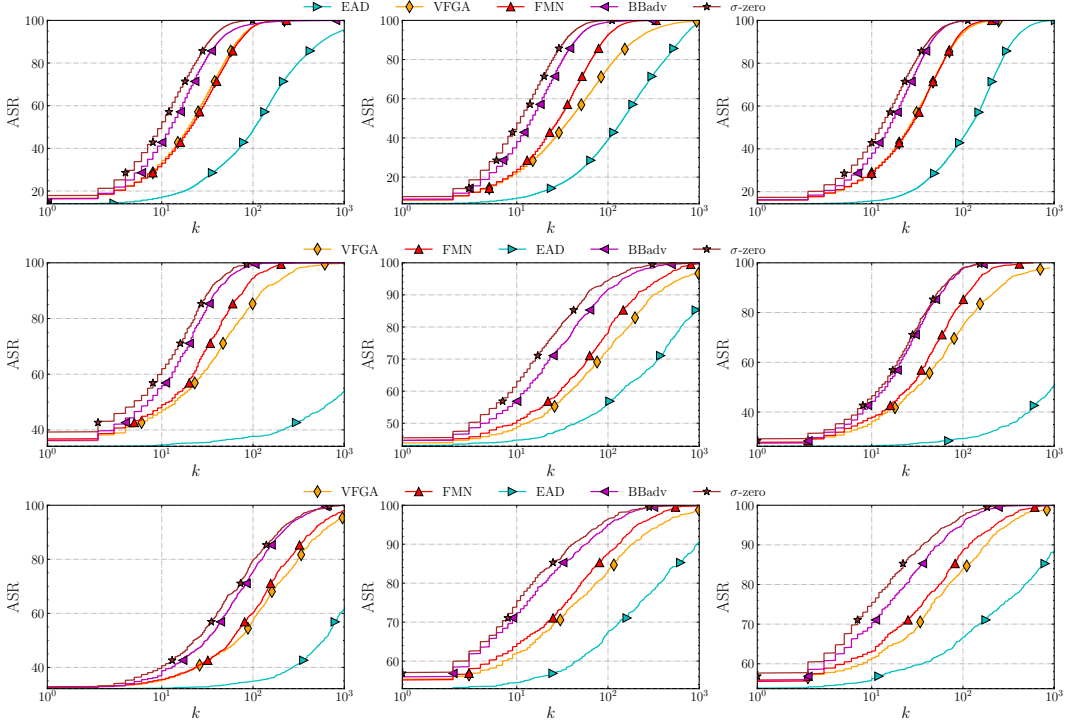

Figure 7: From the leftmost to the rightmost we report the robustness evaluation curves for C8, C9, C10 (top-row), I1, I2, I3 (middle-row) and I4, I5, I6 (bottom-row)



Table 6: Minimum-norm comparison results for CIFAR-10 and ImageNet with  $N = 1000$  on remaining models. For each attack and model (M), we report ASR at  $k = 10, 50, \infty$ , median perturbation size  $\tilde{\ell}_0$ , mean runtime  $s$  (in seconds), mean number of queries  $q$  ( $\div 1000$ ), and maximum VRAM usage (in GB). When VFGA exceeds the VRAM limit, we re-run it using a smaller batch size, increasing its runtime  $t$ . We denote those cases with the symbol ‘\*’. Lastly we indicate with  $\sigma$ -zero \* the case where we use  $\sigma = 1$  and  $\tau_0 = 0.1$ .

| Attack          | M   | ASR <sub>24</sub> | ASR <sub>50</sub> | ASR <sub>∞</sub> | $\tilde{\ell}_0$ | s      | q    | VRAM  | M   | ASR <sub>24</sub> | ASR <sub>50</sub> | ASR <sub>∞</sub> | $\tilde{\ell}_0$ | s         | q    | VRAM |
|-----------------|-----|-------------------|-------------------|------------------|------------------|--------|------|-------|-----|-------------------|-------------------|------------------|------------------|-----------|------|------|
| CIFAR-10        |     |                   |                   |                  |                  |        |      |       |     |                   |                   |                  |                  |           |      |      |
| SF              | C5  | 11.19             | 11.19             | 56.56            | 3072             | 1.42   | 0.37 | 1.57  | C8  | 23.67             | 24.85             | 62.41            | 3072             | 9.86      | 0.20 | 5.50 |
| EAD             |     | 10.91             | 21.33             | 100.0            | 126              | 2.32   | 6.90 | 1.47  |     | 23.23             | 33.68             | 100.0            | 105              | 8.33      | 5.37 | 5.39 |
| PDPGD           |     | 41.70             | 78.97             | 100.0            | 27               | 0.64   | 2.00 | 1.31  |     | 33.38             | 48.96             | 99.82            | 51               | 2.15      | 2.00 | 5.12 |
| VFGA            |     | 77.25             | 93.41             | 99.99            | 11               | 0.17   | 0.32 | 11.96 |     | 56.76             | 81.79             | 99.89            | 20               | 4.30*     | 0.62 | > 40 |
| FMN             |     | 95.99             | 99.97             | 100.0            | 7                | 0.60   | 2.00 | 1.3   |     | 54.74             | 79.70             | 100.0            | 21               | 2.05      | 2.00 | 5.12 |
| BB              |     | 97.43             | 99.79             | 100.0            | 7                | 5.81   | 2.76 | 1.47  |     | 59.82             | 78.76             | 83.58            | 16               | 12.49     | 3.14 | 5.39 |
| BBadv           |     | 97.50             | 99.86             | 100.0            | 7                | 4.57   | 2.01 | 1.63  |     | 74.51             | 93.42             | 100.0            | 13               | 6.99      | 2.01 | 5.51 |
| $\sigma$ -zero  |     | <b>99.20</b>      | <b>100.0</b>      | 100.0            | 5                | 0.74   | 2.00 | 1.51  |     | <b>81.23</b>      | <b>97.33</b>      | 100.0            | <b>10</b>        | 2.75      | 2.00 | 5.90 |
| SF              | C6  | 16.78             | 16.79             | 35.38            | ∞                | 19.74  | 0.62 | 10.00 | C9  | 12.12             | 12.14             | 70.77            | 3072             | 3.28      | 0.22 | 2.25 |
| EAD             |     | 20.75             | 35.90             | 100.0            | 74               | 10.76  | 5.55 | 9.92  |     | 14.51             | 23.62             | 100.0            | 148              | 2.23      | 5.80 | 2.15 |
| PDPGD           |     | 23.84             | 40.89             | 100.0            | 69               | 3.96   | 2.00 | 8.86  |     | 25.31             | 38.41             | 100.0            | 69               | 0.76      | 2.00 | 2.0  |
| VFGA            |     | 45.28             | 67.51             | 99.88            | 29               | 4.91*  | 1.02 | > 40  |     | 38.42             | 56.72             | 99.81            | 39               | 3.15*     | 1.84 | > 40 |
| FMN             |     | 45.73             | 68.38             | 100.0            | 29               | 3.91   | 2.00 | 8.86  |     | 44.38             | 70.24             | 100.0            | 30               | 0.73      | 2.00 | 2.0  |
| BB              |     | 15.26             | 17.14             | 17.94            | ∞                | 3.46   | 2.08 | 9.93  |     | 70.11             | 93.24             | 100.0            | 15               | 6.49      | 2.87 | 2.16 |
| BBadv           |     | 64.47             | 88.92             | 100.0            | 16               | 8.85   | 2.01 | 10.03 |     | 69.45             | 92.91             | 100.0            | 15               | 6.02      | 2.01 | 2.22 |
| $\sigma$ -zero  |     | <b>75.63</b>      | <b>94.47</b>      | 100.0            | <b>11</b>        | 4.41   | 2.00 | 10.43 |     | <b>79.59</b>      | <b>96.93</b>      | 100.0            | <b>11</b>        | 0.89      | 2.00 | 2.65 |
| SF              | C7  | 29.51             | 40.86             | 93.82            | 3039             | 9.3    | 1.56 | 1.90  | C10 | 25.88             | 26.54             | 51.80            | 3072             | 0.58      | 0.33 | 0.51 |
| EAD             |     | 9.92              | 11.14             | 100.0            | 398              | 2.57   | 5.66 | 1.89  |     | 19.44             | 29.23             | 100.0            | 118              | 1.01      | 5.32 | 0.41 |
| PDPGD           |     | 32.60             | 49.19             | 100.0            | 51               | 1.16   | 2.00 | 1.8   |     | 29.98             | 41.00             | 100.0            | 66               | 0.44      | 2.00 | 0.36 |
| VFGA            |     | 61.19             | 90.04             | 99.88            | 19               | 0.28   | 0.52 | 16.53 |     | 48.63             | 74.15             | 99.54            | 25               | 0.17      | 0.77 | 3.07 |
| FMN             |     | 52.14             | 85.60             | 100.0            | 23               | 1.09   | 2.00 | 1.8   |     | 47.89             | 73.71             | 100.0            | 26               | 0.41      | 2.00 | 0.36 |
| BB              |     | 21.44             | 31.03             | 31.36            | ∞                | 3.01   | 2.37 | 1.89  |     | 68.37             | 91.83             | 100.0            | 15               | 10.90     | 2.93 | 0.41 |
| BBadv           |     | 77.88             | 99.11             | 100.0            | 14               | 4.51   | 2.01 | 1.99  |     | 67.35             | 93.04             | 100.0            | 16               | 4.60      | 2.01 | 0.54 |
| $\sigma$ -zero  |     | <b>81.38</b>      | <b>99.15</b>      | 100.0            | <b>12</b>        | 1.39   | 2.00 | 1.91  |     | <b>73.96</b>      | <b>94.21</b>      | 100.0            | <b>13</b>        | 0.63      | 2.00 | 0.51 |
| FMN             | C11 | 39.57             | 74.75             | 100.0            | 32               | 0.11   | 2.00 | 0.59  | C12 | 48.3              | 78.16             | 100.0            | 26               | 0.11      | 2.00 | 0.59 |
| BBadv           |     | 14.07             | 18.57             | 100.0            | 183              | 2.52   | 2.01 | 0.65  |     | 18.33             | 19.75             | 100.0            | 290              | 2.57      | 2.01 | 0.65 |
| $\sigma$ -zero  |     | 12.38             | 15.91             | 100.0            | 144              | 0.24   | 2.00 | 1.03  |     | 18.52             | 21.31             | 100.0            | 187              | 0.33      | 2.00 | 1.03 |
| $\sigma$ -zero* |     | <b>44.78</b>      | <b>85.05</b>      | 100.0            | <b>27</b>        | 0.23   | 2.00 | 1.03  |     |                   | <b>54.62</b>      | <b>90.12</b>     | 100.0            | <b>22</b> | 0.23 | 2.00 |
| ImageNet        |     |                   |                   |                  |                  |        |      |       |     |                   |                   |                  |                  |           |      |      |
| Attack          | M   | ASR <sub>24</sub> | ASR <sub>50</sub> | ASR <sub>∞</sub> | $\tilde{\ell}_0$ | s      | q    | VRAM  | M   | ASR <sub>24</sub> | ASR <sub>50</sub> | ASR <sub>∞</sub> | $\tilde{\ell}_0$ | s         | q    | VRAM |
| EAD             | I5  | 56.6              | 60.2              | 100.0            | 0                | 21.38  | 5.50 | 1.41  | I6  | 59.0              | 61.4              | 100.0            | 0                | 7.89      | 5.29 | 0.48 |
| VFGA            |     | 69.0              | 76.2              | 98.8             | 0                | 6.11*  | 1.43 | > 40  |     | 66.8              | 76.6              | 99.3             | 0                | 1.74*     | 1.21 | > 40 |
| FMN             |     | 71.0              | 79.5              | 100.0            | 0                | 1.97   | 2.00 | 2.30  |     | 70.9              | 78.7              | 100.0            | 0                | 0.72      | 2.00 | 0.67 |
| BBadv           |     | 82.3              | 89.0              | 100.0            | 0                | 185.34 | 2.01 | 2.41  |     | 80.3              | 89.6              | 100              | 0                | 199.47    | 2.01 | 0.73 |
| $\sigma$ -zero  |     | <b>85.1</b>       | <b>91.4</b>       | 100.0            | 0                | 2.76   | 2.00 | 2.52  |     | <b>86.2</b>       | <b>92.8</b>       | 100.0            | 0                | 1.13      | 2.00 | 0.84 |
| FMN             | I7  | 39.2              | 48.5              | 100              | 54.5             | 5.84   | 2    | 17.44 | I8  | 38.1              | 46.8              | 100              | 67               | 5.17      | 2    | 7.91 |
| BBadv           |     | 49.7              | 62                | 100              | 25.5             | 128.2  | 2    | 17.86 |     | 46.5              | 58.6              | 100              | 29.5             | 113.87    | 2    | 8.30 |
| $\sigma$ -zero  |     | <b>55.4</b>       | <b>68.2</b>       | 100              | <b>16</b>        | 8.62   | 2    | 19.03 |     |                   | <b>50.1</b>       | <b>64.4</b>      | 100              | <b>24</b> | 6.6  | 2    |

Table 7: Minimum-norm comparison results for MNIST with  $N = 100$ . See the caption of [Table 6](#) for further details.

| Attack         | M  | ASR <sub>24</sub> | ASR <sub>50</sub> | ASR <sub><math>\infty</math></sub> | $\tilde{\ell}_0$ | s    | q    | VRAM | M  | ASR <sub>24</sub> | ASR <sub>50</sub> | ASR <sub><math>\infty</math></sub> | $\tilde{\ell}_0$ | s    | q    | VRAM |
|----------------|----|-------------------|-------------------|------------------------------------|------------------|------|------|------|----|-------------------|-------------------|------------------------------------|------------------|------|------|------|
| MNIST          |    |                   |                   |                                    |                  |      |      |      |    |                   |                   |                                    |                  |      |      |      |
| SF             | M1 | 5.11              | 6.76              | 96.98                              | 469              | 1.07 | 0.18 | 0.07 | M2 | 0.98              | 1.21              | 91.68                              | 463              | 2.87 | 0.86 | 0.07 |
| EAD            |    | 3.73              | 46.65             | 100.0                              | 52               | 0.06 | 1.14 | 0.07 |    | 3.51              | 35.57             | 100.0                              | 61               | 0.06 | 0.99 | 0.07 |
| PDPGD          |    | 0.98              | 0.98              | 100.0                              | 359              | 0.01 | 0.20 | 0.07 |    | 0.52              | 0.52              | 95.02                              | 254              | 0.01 | 0.20 | 0.07 |
| VFGA           |    | 4.82              | 82.68             | 100.0                              | 27               | 0.07 | 0.76 | 0.23 |    | 4.82              | 38.99             | 99.98                              | 57               | 0.07 | 1.34 | 0.24 |
| BB             |    | <b>68.52</b>      | 98.00             | 100.0                              | <b>20</b>        | 0.13 | 1.19 | 0.08 |    | 62.98             | 83.00             | 87.87                              | 18               | 0.13 | 1.69 | 0.08 |
| FMN            |    | 33.03             | 83.09             | 88.92                              | 30               | 0.01 | 0.20 | 0.07 |    | 10.05             | 14.03             | 14.81                              | $\infty$         | 0.01 | 0.20 | 0.07 |
| BBadv          |    | 62.29             | 90.88             | 100.0                              | 21               | 0.09 | 0.21 | 0.08 |    | 41.19             | 58.80             | 100.0                              | 34               | 0.07 | 0.21 | 0.08 |
| $\sigma$ -zero |    | 61.12             | <b>98.45</b>      | 100.0                              | 22               | 0.01 | 0.20 | 0.08 |    | <b>87.20</b>      | <b>99.82</b>      | 100.0                              | <b>13</b>        | 0.01 | 0.20 | 0.08 |

Table 8: Minimum-norm comparison results for CIFAR-10 with  $N = 100$ . See the caption of Table 6 for further details.

| Attack   | M      | ASR <sub>24</sub> | ASR <sub>50</sub> | ASR <sub>∞</sub> | $\tilde{\ell}_0$ | s    | q    | VRAM  | M      | ASR <sub>24</sub> | ASR <sub>50</sub> | ASR <sub>∞</sub> | $\tilde{\ell}_0$ | s     | q    | VRAM  |
|----------|--------|-------------------|-------------------|------------------|------------------|------|------|-------|--------|-------------------|-------------------|------------------|------------------|-------|------|-------|
| CIFAR-10 |        |                   |                   |                  |                  |      |      |       |        |                   |                   |                  |                  |       |      |       |
| SF       | C1     | 17.67             | 17.76             | 47.26            | ∞                | 3.17 | 0.35 | 1.62  | C6     | 16.75             | 16.79             | 35.36            | ∞                | 19.74 | 0.62 | 10.00 |
| EAD      |        | 16.74             | 28.74             | 100.0            | 100.0            | 0.27 | 0.80 | 1.53  |        | 19.79             | 32.94             | 100.0            | 83               | 1.58  | 0.82 | 10.04 |
| PDPGD    |        | 10.31             | 10.31             | 99.39            | 2421             | 0.05 | 0.20 | 1.43  |        | 11.26             | 11.26             | 99.75            | 2814             | 0.32  | 0.2  | 8.97  |
| VFGA     |        | 50.73             | 75.34             | 93.69            | 24               | 0.23 | 0.72 | 11.83 |        | 45.33             | 67.05             | 87.75            | 29               | 3.75  | 0.86 | > 40  |
| FMN      |        | 46.90             | 69.36             | 80.68            | 27               | 0.05 | 0.20 | 1.43  |        | 42.67             | 61.49             | 72.34            | 33               | 0.31  | 0.2  | 8.98  |
| BB       |        | 12.98             | 14.29             | 14.97            | ∞                | 0.44 | 1.95 | 1.59  |        | 14.99             | 16.88             | 17.91            | ∞                | 2.67  | 1.95 | 10.04 |
| BBadv    | σ-zero | 60.52             | 86.63             | 100.0            | 18               | 0.41 | 0.21 | 1.59  | σ-zero | 59.61             | 84.59             | 100.0            | 18               | 0.76  | 0.21 | 10.04 |
| σ-zero   |        | <b>63.60</b>      | <b>88.27</b>      | 100.0            | <b>16</b>        | 0.08 | 0.20 | 1.84  |        | <b>63.44</b>      | <b>87.2</b>       | 100.0            | <b>16</b>        | 0.44  | 0.2  | 10.29 |
| SF       | C2     | 17.86             | 20.59             | 94.26            | 3071             | 2.44 | 0.26 | 1.91  | C7     | 21.07             | 38.76             | 82.71            | 3062             | 4.30  | 9.67 | 1.90  |
| EAD      |        | 9.50              | 10.67             | 100.0            | 451              | 0.30 | 0.71 | 2.01  |        | 9.68              | 10.56             | 100.0            | 434              | 0.48  | 0.90 | 2.00  |
| PDPGD    |        | 8.92              | 8.92              | 75.31            | 3052             | 0.09 | 0.20 | 1.91  |        | 9.17              | 9.17              | 99.90            | 2709             | 0.12  | 0.20 | 1.91  |
| VFGA     |        | 39.31             | 66.46             | 91.64            | 33               | 0.34 | 0.87 | 16.64 |        | 60.94             | 90.04             | 99.16            | 19               | 0.29  | 0.52 | 16.64 |
| FMN      |        | 37.13             | 62.41             | 71.3             | 36               | 0.08 | 0.20 | 1.92  |        | 50.70             | 79.48             | 87.20            | 24               | 0.08  | 0.20 | 1.91  |
| BB       |        | 38.18             | 53.53             | 57.05            | 40               | 0.59 | 1.90 | 2.00  |        | 26.39             | 32.41             | 32.83            | ∞                | 0.50  | 1.93 | 2.00  |
| BBadv    | σ-zero | <b>63.56</b>      | <b>92.74</b>      | 100.0            | <b>19</b>        | 0.40 | 0.21 | 2.00  | σ-zero | <b>74.91</b>      | <b>98.37</b>      | 100.0            | <b>15</b>        | 0.41  | 0.21 | 2.00  |
| σ-zero   |        | 56.94             | 88.60             | 100.0            | 21               | 0.11 | 0.20 | 2.25  |        | 68.14             | 94.90             | 100.0            | 16               | 0.11  | 0.20 | 2.25  |
| SF       | C3     | 20.89             | 24.36             | 58.29            | 3072             | 1.63 | 0.48 | 0.66  | C8     | 23.87             | 24.85             | 62.42            | 3072             | 9.86  | 0.2  | 5.50  |
| EAD      |        | 13.03             | 13.18             | 100.0            | 835              | 0.11 | 0.65 | 0.64  |        | 21.71             | 29.59             | 100.0            | 128              | 0.67  | 0.66 | 5.51  |
| PDPGD    |        | 12.95             | 12.98             | 99.47            | 2566             | 0.04 | 0.20 | 0.59  |        | 13.96             | 13.96             | 54.16            | 3072             | 0.21  | 0.2  | 5.23  |
| VFGA     |        | 28.63             | 49.73             | 82.94            | 51               | 0.13 | 1.13 | 4.44  |        | 56.81             | 82.04             | 97.08            | 20               | 4.32  | 0.61 | > 40  |
| FMN      |        | 26.76             | 37.90             | 43.90            | ∞                | 0.03 | 0.20 | 0.59  |        | 53.42             | 76.59             | 87.1             | 22.0             | 0.21  | 0.2  | 5.24  |
| BB       |        | 16.40             | 22.91             | 27.64            | ∞                | 1.04 | 2.25 | 0.65  |        | 60.74             | 78.14             | 84.46            | 17               | 1.36  | 1.67 | 5.55  |
| BBadv    | σ-zero | <b>33.68</b>      | <b>66.79</b>      | 100.0            | <b>37</b>        | 0.40 | 0.21 | 0.65  | σ-zero | <b>70.31</b>      | 91.58             | 100.0            | 14               | 0.55  | 0.21 | 5.51  |
| σ-zero   |        | 30.56             | 57.71             | 100.0            | 43               | 0.04 | 0.20 | 0.89  |        | 69.49             | <b>91.87</b>      | 100.0            | <b>14</b>        | 0.25  | 0.2  | 6.76  |
| SF       | C4     | 31.85             | 42.97             | 84.45            | 70               | 1.54 | 0.47 | 0.66  | C9     | 12.03             | 12.14             | 70.77            | 3072             | 3.28  | 0.22 | 2.25  |
| EAD      |        | 24.1              | 24.4              | 100.0            | 844              | 0.12 | 0.66 | 0.65  |        | 13.61             | 21.61             | 100.0            | 162              | 0.31  | 0.8  | 2.27  |
| PDPGD    |        | 23.78             | 23.78             | 66.62            | 3072             | 0.04 | 0.2  | 0.59  |        | 6.31              | 6.31              | 96.2             | 2773             | 0.06  | 0.2  | 2.11  |
| VFGA     |        | 46.7              | 69.52             | 93.05            | 28               | 0.14 | 0.77 | 4.22  |        | 38.22             | 56.56             | 75.79            | 39.5             | 1.45  | 1.06 | > 40  |
| FMN      |        | 42.69             | 58.78             | 65.83            | 35               | 0.03 | 0.2  | 0.59  |        | 40.27             | 59.69             | 68.88            | 35               | 0.06  | 0.2  | 2.19  |
| BB       |        | 25.91             | 27.98             | 29.51            | ∞                | 0.54 | 2.09 | 0.65  |        | 66.02             | 90.74             | 100.0            | 16               | 0.65  | 1.07 | 2.27  |
| BBadv    | σ-zero | <b>52.25</b>      | <b>80.64</b>      | 100.0            | <b>23</b>        | 0.36 | 0.21 | 0.65  | σ-zero | 64.41             | 89.7              | 100.0            | 17               | 0.42  | 0.21 | 2.27  |
| σ-zero   |        | 49.74             | 73.75             | 100.0            | 25               | 0.04 | 0.2  | 0.89  |        | <b>65.96</b>      | <b>90.95</b>      | 100.0            | <b>16</b>        | 0.09  | 0.2  | 2.52  |
| SF       | C5     | 11.19             | 11.19             | 56.56            | 3072             | 1.42 | 0.37 | 1.56  | C10    | 24.28             | 26.54             | 51.90            | 3072             | 0.58  | 0.33 | 0.52  |
| EAD      |        | 10.42             | 19.09             | 100.0            | 146              | 0.26 | 0.77 | 1.58  |        | 18.82             | 26.17             | 100.0            | 144              | 0.11  | 0.79 | 0.52  |
| PDPGD    |        | 5.23              | 5.23              | 100.0            | 3057             | 0.05 | 0.20 | 1.43  |        | 14.29             | 14.29             | 90.95            | 3057             | 0.03  | 0.2  | 0.47  |
| VFGA     |        | 77.22             | 93.44             | 98.99            | 11               | 0.17 | 0.38 | 12.08 |        | 48.49             | 74.14             | 94.16            | 26               | 0.12  | 0.73 | 3.18  |
| FMN      |        | 89.83             | 97.72             | 98.86            | <b>8</b>         | 0.05 | 0.20 | 1.43  |        | 46.75             | 69.77             | 80.68            | 27               | 0.03  | 0.2  | 0.48  |
| BB       |        | 84.42             | 97.55             | 100.0            | 10               | 0.62 | 0.95 | 1.59  |        | <b>63.70</b>      | 89.39             | 100.0            | <b>17</b>        | 0.43  | 1.13 | 0.53  |
| BBadv    | σ-zero | 83.81             | 97.35             | 100.0            | 10               | 0.45 | 0.21 | 1.59  | σ-zero | 63.29             | <b>90.08</b>      | 100.0            | <b>17</b>        | 0.35  | 0.21 | 0.53  |
| σ-zero   |        | <b>91.54</b>      | <b>99.84</b>      | 100.0            | 9                | 0.08 | 0.20 | 1.83  |        | 60.79             | 86.02             | 100.0            | 18               | 0.04  | 0.2  | 0.77  |

Table 9: Minimum-norm comparison results for ImageNet with  $N = 100$ . See the caption of Table 6 for further details.

| Attack   | M  | ASR <sub>24</sub> | ASR <sub>50</sub> | ASR <sub>∞</sub> | $\tilde{\ell}_0$ | s     | q    | VRAM | M  | ASR <sub>24</sub> | ASR <sub>50</sub> | ASR <sub>∞</sub> | $\tilde{\ell}_0$ | s     | q    | VRAM |
|----------|----|-------------------|-------------------|------------------|------------------|-------|------|------|----|-------------------|-------------------|------------------|------------------|-------|------|------|
| ImageNet |    |                   |                   |                  |                  |       |      |      |    |                   |                   |                  |                  |       |      |      |
| EAD      | I1 | 34.7              | 35.9              | 100.0            | 484              | 1.02  | 0.67 | 0.46 | I4 | 32.4              | 33.0              | 100.0            | 808              | 5.15  | 0.7  | 1.68 |
| VFGA     |    | 58.3              | 72.2              | 85.3             | 14               | 1.06  | 0.70 | > 40 |    | 40.0              | 46.8              | 56.9             | 66.5             | 9.23  | 1.2  | > 40 |
| FMN      |    | 55.4              | 64.5              | 68.1             | 14               | 0.08  | 0.20 | 0.66 |    | 39.9              | 46.2              | 47.5             | ∞                | 0.44  | 0.2  | 2.97 |
| BBadv    |    | 67.6              | 83.3              | 100.0            | 10               | 23.02 | 0.21 | 0.72 |    | <b>46.4</b>       | <b>58.0</b>       | 99.9             | 32               | 21.23 | 0.21 | 3.07 |
| σ-zero   |    | <b>69.2</b>       | <b>86.9</b>       | 100.0            | <b>10</b>        | 0.13  | 0.20 | 0.84 |    | 43.7              | 55.2              | 100.0            | <b>32</b>        | 0.61  | 0.2  | 3.20 |
| EAD      | I2 | 47.1              | 50.1              | 100.0            | 48               | 2.32  | 0.68 | 1.42 | I5 | 56.2              | 60.2              | 100.0            | 0                | 2.46  | 0.72 | 1.41 |
| VFGA     |    | 54.3              | 63.2              | 96.7             | 13               | 2.88  | 0.72 | > 40 |    | 68.9              | 76.0              | 83.0             | 0                | 2.33  | 0.59 | > 40 |
| FMN      |    | 55.9              | 60.0              | 62.4             | 10               | 0.20  | 0.20 | 2.30 |    | 67.8              | 72.0              | 74.3             | 0                | 0.20  | 0.20 | 2.30 |
| BBadv    |    | 70.1              | 80.1              | 100.0            | 5                | 20.49 | 0.21 | 2.40 |    | 80.8              | 87.8              | 100.0            | 0                | 18.60 | 0.21 | 2.41 |
| σ-zero   |    | <b>71.0</b>       | <b>82.7</b>       | 100.0            | <b>4</b>         | 0.29  | 0.20 | 2.52 |    | <b>81.8</b>       | <b>89.3</b>       | 100.0            | 0                | 0.29  | 0.20 | 2.52 |
| EAD      | I3 | 26.9              | 27.7              | 100.0            | 1108             | 0.58  | 0.61 | 1.41 | I6 | 57.4              | 60.0              | 100.0            | 0                | 1.03  | 0.72 | 0.48 |
| VFGA     |    | 47.0              | 58.7              | 74.0             | 31               | 3.07  | 0.96 | > 40 |    | 66.8              | 75.2              | 83.9             | 0                | 0.91  | 0.59 | > 40 |
| FMN      |    | 44.4              | 50.6              | 53.2             | 47               | 0.16  | 0.2  | 2.30 |    | 69.2              | 74.9              | 77.2             | 0                | 0.07  | 0.2  | 0.67 |
| BBadv    |    | <b>53.6</b>       | <b>74.7</b>       | 100.0            | <b>20</b>        | 23.86 | 0.21 | 2.41 |    | 80.1              | 89.1              | 100.0            | 0                | 19.68 | 0.21 | 0.73 |
| σ-zero   |    | 52.9              | 74.4              | 100.0            | 21               | 0.23  | 0.2  | 2.52 |    | <b>82.2</b>       | <b>90.5</b>       | 100.0            | 0                | 0.12  | 0.2  | 0.84 |

Table 10: Fixed-budget comparison results with  $N = 1000$  on CIFAR10 remaining models. Sparse-RS was executed with double the steps,  $2N$ , to ensure fair comparison as it lacks backward passes. For each attack, we report the corresponding ASR with different feature budget levels (24,50,100). We report the execution time  $s_{24}$  and query usage  $q_{24}$  for the smaller  $k = 24$ , as it requires, on average, more iterations due to the more challenging problem. Lastly we indicate with  $\sigma\text{-zero}^*$  the case where we use  $\sigma = 1$  and  $\tau_0 = 0.1$ .

| Attack                 | M   | ASR <sub>24</sub> | ASR <sub>50</sub> | ASR <sub>100</sub> | $q_{24}$ | $s_{24}$ | VRAM  | M   | ASR <sub>24</sub> | ASR <sub>50</sub> | ASR <sub>100</sub> | $q_{24}$ | $s_{24}$ | VRAM |
|------------------------|-----|-------------------|-------------------|--------------------|----------|----------|-------|-----|-------------------|-------------------|--------------------|----------|----------|------|
| CIFAR-10               |     |                   |                   |                    |          |          |       |     |                   |                   |                    |          |          |      |
| PGD- $\ell_0$          | C5  | 68.60             | 88.89             | 98.14              | 2.00     | 1.95     | 1.89  | C8  | 42.81             | 66.19             | 90.49              | 2.00     | 3.24     | 7.36 |
| Sparse-RS              |     | 99.71             | 100.0             | 100.0              | 0.08     | 0.10     | 1.91  |     | 72.54             | 86.72             | 94.84              | 0.78     | 1.10     | 7.35 |
| sPGD <sub>p</sub>      |     | <b>99.82</b>      | 100.0             | 100.0              | 0.02     | 0.16     | 2.06  |     | 68.47             | 90.47             | 99.56              | 0.70     | 1.48     | 7.62 |
| sPGD <sub>u</sub>      |     | 97.84             | 99.98             | 100.0              | 0.09     | 0.37     | 2.06  |     | 73.55             | 94.55             | 99.97              | 0.60     | 1.65     | 7.62 |
| $\sigma\text{-zero}$   |     | 99.20             | 100.0             | 100.0              | 0.22     | 0.11     | 2.07  |     | <b>81.23</b>      | <b>97.33</b>      | <b>99.97</b>       | 0.52     | 0.54     | 7.76 |
| PGD- $\ell_0$          | C6  | 32.80             | 50.53             | 77.06              | 2.00     | 4.88     | 12.79 | C9  | 31.45             | 52.79             | 80.27              | 2.00     | 2.01     | 2.91 |
| Sparse-RS              |     | <b>76.61</b>      | 89.88             | 96.22              | 0.67     | 1.98     | 12.74 |     | 68.77             | 82.06             | 89.81              | 0.85     | 0.56     | 2.89 |
| sPGD <sub>p</sub>      |     | 63.66             | 87.07             | 98.67              | 0.80     | 2.83     | 13.77 |     | 61.0              | 83.49             | 96.76              | 0.87     | 0.88     | 3.03 |
| sPGD <sub>u</sub>      |     | 64.28             | 88.25             | 99.09              | 0.77     | 2.77     | 13.77 |     | 63.48             | 87.59             | 98.49              | 0.81     | 0.85     | 3.03 |
| $\sigma\text{-zero}$   |     | 75.63             | <b>94.47</b>      | <b>99.78</b>       | 0.66     | 1.75     | 13.82 |     | <b>79.59</b>      | <b>96.93</b>      | <b>99.91</b>       | 0.57     | 2.04     | 2.91 |
| PGD- $\ell_0$          | C7  | 37.91             | 68.90             | 95.31              | 2.00     | 1.96     | 2.47  | C10 | 38.33             | 61.88             | 89.50              | 2.00     | 1.12     | 0.51 |
| Sparse-RS              |     | 63.75             | 84.49             | 95.74              | 0.97     | 0.61     | 2.46  |     | 64.80             | 81.46             | 91.13              | 0.91     | 0.45     | 0.50 |
| sPGD <sub>p</sub>      |     | 72.82             | 96.74             | 99.98              | 0.61     | 0.94     | 2.57  |     | 59.94             | 84.87             | 98.82              | 0.87     | 0.44     | 0.55 |
| sPGD <sub>u</sub>      |     | <b>81.64</b>      | 99.09             | 100.0              | 0.42     | 0.69     | 2.57  |     | 65.07             | 90.78             | <b>99.83</b>       | 0.75     | 0.41     | 0.55 |
| $\sigma\text{-zero}$   |     | 81.38             | <b>99.15</b>      | 100.0              | 0.46     | 0.21     | 2.68  |     | <b>73.96</b>      | <b>94.21</b>      | 99.80              | 0.67     | 0.14     | 0.57 |
| Sparse-RS              | C11 | 28.08             | 41.89             | 58.45              | 0.38     | 1.53     | 0.59  | C12 | 51.64             | 71.27             | 86.57              | 0.32     | 1.14     | 0.59 |
| sPGD <sub>u</sub>      |     | 15.87             | 21.43             | 32.67              | 0.26     | 1.71     | 0.65  |     | 22.78             | 26.56             | 34.09              | 0.31     | 1.58     | 0.64 |
| sPGD <sub>p</sub>      |     | 13.61             | 17.07             | 30.11              | 0.25     | 1.74     | 0.65  |     | 24.52             | 34.39             | 59.89              | 0.30     | 1.54     | 0.65 |
| $\sigma\text{-zero}$   |     | 12.38             | 15.91             | 30.43              | 0.20     | 1.77     | 1.03  |     | 18.52             | 21.31             | 28.81              | 0.27     | 1.65     | 1.03 |
| $\sigma\text{-zero}^*$ |     | <b>44.78</b>      | <b>85.05</b>      | <b>99.76</b>       | 0.15     | 1.33     | 1.03  |     | <b>54.62</b>      | <b>90.12</b>      | <b>99.94</b>       | 0.13     | 1.15     | 1.03 |

Table 11: Fixed-budget comparison results for ImageNet with  $N = 1000$  on remaining models. Sparse-RS was executed with double the steps,  $2N$ , to ensure fair comparison as it lacks backward passes. For each attack, we report the corresponding ASR with budget level  $k = 150$ . We report the execution time  $s_{100}$  and query usage  $q_{100}$  for the smaller  $k = 100$ , as it requires, on average, more iterations due to the more challenging problem.

| Attack               | M  | ASR <sub>100</sub> | ASR <sub>150</sub> | $q_{100}$ | $s_{100}$ | VRAM  | M  | ASR <sub>150</sub> | ASR <sub>150</sub> | $q_{100}$ | $s_{100}$ | VRAM |
|----------------------|----|--------------------|--------------------|-----------|-----------|-------|----|--------------------|--------------------|-----------|-----------|------|
| ImageNet             |    |                    |                    |           |           |       |    |                    |                    |           |           |      |
| Sparse-RS            | I5 | 83.6               | 87.5               | 0.44      | 2.85      | 4.39  | I6 | 85.4               | 89.2               | 0.41      | 3.46      | 1.29 |
| sPGD <sub>p</sub>    |    | 89.8               | 94.5               | 0.24      | 1.64      | 4.48  |    | 90.4               | 95.2               | 0.22      | 0.98      | 1.33 |
| sPGD <sub>u</sub>    |    | 86.5               | 92.6               | 0.29      | 1.55      | 4.48  |    | 89.1               | 94.0               | 0.24      | 1.15      | 1.33 |
| $\sigma\text{-zero}$ |    | <b>95.9</b>        | <b>98.2</b>        | 0.12      | 0.16      | 4.90  |    | <b>98.1</b>        | <b>98.8</b>        | 0.10      | 0.08      | 1.79 |
| Sparse-RS            | I7 | 58.20              | 60.60              | 0.95      | 5.21      | 17.43 | I8 | 49.20              | 52.10              | 1.13      | 3.28      | 7.89 |
| sPGD <sub>p</sub>    |    | 67.50              | 75.50              | 0.70      | 4.85      | 17.80 |    | 65.10              | 75.20              | 0.75      | 3.56      | 8.24 |
| sPGD <sub>u</sub>    |    | 65.70              | 75.10              | 0.73      | 5.37      | 17.82 |    | 65.10              | 75.20              | 0.73      | 5.68      | 8.23 |
| $\sigma\text{-zero}$ |    | <b>82.10</b>       | <b>87.00</b>       | 0.43      | 1.87      | 19.03 |    | <b>78.00</b>       | <b>86.20</b>       | 0.50      | 1.67      | 9.46 |

Table 12: Fixed-budget comparison results with  $N = 5000$  on MNIST. See the caption of Table 10 for further details.

| Attack               | M  | ASR <sub>24</sub> | ASR <sub>50</sub> | ASR <sub>100</sub> | $q_{24}$ | $s_{24}$ | VRAM | M  | ASR <sub>24</sub> | ASR <sub>50</sub> | ASR <sub>100</sub> | $q_{24}$ | $s_{24}$ | VRAM |
|----------------------|----|-------------------|-------------------|--------------------|----------|----------|------|----|-------------------|-------------------|--------------------|----------|----------|------|
| MNIST                |    |                   |                   |                    |          |          |      |    |                   |                   |                    |          |          |      |
| Sparse-RS            | M1 | 88.13             | 99.26             | 99.99              | 2.45     | 1.86     | 0.04 | M2 | <b>99.88</b>      | 99.97             | 100.0              | 0.31     | 0.17     | 0.04 |
| sPGD <sub>p</sub>    |    | 81.22             | 99.30             | 100.0              | 2.83     | 1.50     | 0.05 |    | 83.88             | 99.88             | 99.97              | 2.33     | 0.9      | 0.05 |
| sPGD <sub>u</sub>    |    | 87.30             | 99.85             | 100.0              | 1.60     | 1.44     | 0.05 |    | 74.38             | 99.46             | 99.99              | 3.47     | 0.96     | 0.05 |
| $\sigma\text{-zero}$ |    | <b>88.63</b>      | <b>100.0</b>      | 100.0              | 1.38     | 0.20     | 0.08 |    | 99.67             | <b>100.0</b>      | 100.0              | 0.24     | 0.02     | 0.08 |

Table 13: Fixed-budget comparison results with  $N = 5000$  on CIFAR10. See the caption of Table 10 for further details.

| Attack            | M  | ASR <sub>24</sub> | ASR <sub>50</sub> | ASR <sub>100</sub> | q <sub>24</sub> | s <sub>24</sub> | VRAM | M   | ASR <sub>24</sub> | ASR <sub>50</sub> | ASR <sub>100</sub> | q <sub>24</sub> | s <sub>24</sub> | VRAM |
|-------------------|----|-------------------|-------------------|--------------------|-----------------|-----------------|------|-----|-------------------|-------------------|--------------------|-----------------|-----------------|------|
| CIFAR-10          |    |                   |                   |                    |                 |                 |      |     |                   |                   |                    |                 |                 |      |
| Sparse-RS         | C1 | <b>82.94</b>      | 94.77             | 98.68              | 2.55            | 1.81            | 1.92 | C5  | <b>99.93</b>      | 99.98             | 99.99              | 0.15            | 0.14            | 1.91 |
| sPGD <sub>p</sub> |    | 71.88             | 93.17             | 99.75              | 3.21            | 2.78            | 2.06 |     | 99.93             | 100.0             | 100.0              | 0.17            | 0.18            | 2.05 |
| sPGD <sub>u</sub> |    | 69.73             | 92.86             | 99.79              | 3.34            | 2.98            | 2.06 |     | 99.73             | 100.0             | 100.0              | 0.26            | 1.31            | 2.05 |
| $\sigma$ -zero    |    | 80.91             | <b>96.81</b>      | <b>99.98</b>       | 3.23            | 1.35            | 2.09 |     | 99.81             | 100.0             | 100.0              | 0.61            | 0.18            | 2.05 |
| Sparse-RS         | C2 | 71.21             | 90.28             | 97.69              | 3.89            | 2.49            | 2.46 | C7  | 77.06             | 94.33             | 99.25              | 3.38            | 2.15            | 2.46 |
| sPGD <sub>p</sub> |    | 64.88             | 92.03             | 99.85              | 3.97            | 3.69            | 2.57 |     | 78.41             | 98.36             | 100.0              | 2.59            | 5.87            | 2.57 |
| sPGD <sub>u</sub> |    | 68.61             | 94.99             | 99.96              | 3.49            | 3.46            | 2.57 |     | <b>84.17</b>      | 99.41             | 100.0              | 1.85            | 6.26            | 2.57 |
| $\sigma$ -zero    |    | <b>78.14</b>      | <b>98.39</b>      | <b>100.0</b>       | 3.16            | 1.02            | 2.70 |     | 83.99             | <b>99.49</b>      | 100.0              | 1.82            | 0.69            | 2.70 |
| Sparse-RS         | C3 | 38.43             | 58.27             | 79.59              | 6.77            | 2.61            | 0.69 | C9  | 79.69             | 89.98             | 95.3               | 2.81            | 1.95            | 2.89 |
| sPGD <sub>p</sub> |    | 34.62             | 65.54             | 96.55              | 6.70            | 2.52            | 0.73 |     | 66.39             | 87.65             | 98.19              | 3.73            | 2.75            | 3.03 |
| sPGD <sub>u</sub> |    | 37.29             | 72.03             | 98.49              | 6.48            | 2.96            | 0.73 |     | 68.03             | 90.7              | 99.23              | 3.56            | 2.64            | 3.04 |
| $\sigma$ -zero    |    | <b>40.99</b>      | <b>76.00</b>      | <b>98.98</b>       | 6.32            | 1.42            | 0.77 |     | <b>83.92</b>      | <b>98.39</b>      | <b>99.99</b>       | 2.19            | 0.99            | 3.09 |
| Sparse-RS         | C4 | 54.85             | 71.95             | 86.25              | 5.03            | 2.37            | 0.69 | C10 | 76.62             | 91.5              | 97.89              | 3.20            | 1.46            | 0.50 |
| sPGD <sub>p</sub> |    | 53.36             | 80.97             | 99.13              | 4.94            | 2.24            | 0.73 |     | 65.92             | 90.38             | 99.72              | 3.86            | 1.63            | 0.55 |
| sPGD <sub>u</sub> |    | <b>57.31</b>      | <b>86.11</b>      | <b>99.72</b>       | 4.46            | 2.36            | 0.73 |     | 68.59             | 92.93             | 99.91              | 3.71            | 1.62            | 0.55 |
| $\sigma$ -zero    |    | 57.11             | 84.54             | 99.34              | 4.47            | 1.04            | 0.77 |     | <b>77.74</b>      | <b>95.86</b>      | <b>99.92</b>       | 2.75            | 0.57            | 0.59 |

Table 14: Fixed-budget comparison results with  $N = 5000$  on ImageNet. See the caption of Table 11 for further details.

| Attack            | M  | ASR <sub>100</sub> | ASR <sub>150</sub> | q <sub>100</sub> | s <sub>100</sub> | VRAM | M  | ASR <sub>100</sub> | ASR <sub>150</sub> | q <sub>100</sub> | s <sub>100</sub> | VRAM |
|-------------------|----|--------------------|--------------------|------------------|------------------|------|----|--------------------|--------------------|------------------|------------------|------|
| ImageNet          |    |                    |                    |                  |                  |      |    |                    |                    |                  |                  |      |
| Sparse-RS         | I1 | 94.2               | 95.1               | 1.39             | 7.73             | 1.29 | I4 | 48.8               | 51.7               | 5.68             | 13.51            | 5.73 |
| sPGD <sub>p</sub> |    | 97.3               | 99.6               | 0.45             | 1.95             | 1.41 |    | 66.2               | 78.4               | 3.68             | 21.65            | 5.84 |
| sPGD <sub>u</sub> |    | 93.6               | 98.5               | 0.71             | 2.48             | 1.40 |    | 64.1               | 78.5               | 3.78             | 20.71            | 5.84 |
| $\sigma$ -zero    |    | <b>100.0</b>       | <b>100.0</b>       | 0.72             | 0.31             | 1.83 |    | <b>77.3</b>        | <b>87.8</b>        | 2.42             | 4.17             | 6.33 |
| Sparse-RS         | I2 | 85.1               | 86.8               | 2.06             | 11.0             | 4.39 | I5 | 89.6               | 91.3               | 1.54             | 3.35             | 4.39 |
| sPGD <sub>p</sub> |    | 85.9               | 92.8               | 1.63             | 8.33             | 4.49 |    | 92.0               | 95.9               | 0.94             | 3.35             | 4.39 |
| sPGD <sub>u</sub> |    | 81.3               | 90.5               | 2.00             | 6.88             | 4.49 |    | 88.0               | 93.1               | 1.28             | 5.89             | 4.48 |
| $\sigma$ -zero    |    | <b>94.6</b>        | <b>97.3</b>        | 0.63             | 0.61             | 4.94 |    | <b>96.9</b>        | <b>98.4</b>        | 0.41             | 0.34             | 4.94 |
| Sparse-RS         | I3 | 74.8               | 76.6               | 3.54             | 6.38             | 4.39 | I6 | 87.5               | 92.7               | 1.36             | 2.05             | 1.29 |
| sPGD <sub>p</sub> |    | 87.6               | 95.4               | 1.61             | 6.29             | 4.49 |    | 96.5               | 97.0               | 0.83             | 1.39             | 1.33 |
| sPGD <sub>u</sub> |    | 81.4               | 93.7               | 2.04             | 6.54             | 4.49 |    | 90.4               | 94.7               | 2.04             | 2.35             | 1.33 |
| $\sigma$ -zero    |    | <b>98.2</b>        | <b>99.7</b>        | 1.68             | 1.44             | 4.94 |    | <b>97.2</b>        | <b>99.1</b>        | 0.35             | 0.12             | 1.83 |

Table 15: Fixed-budget comparison results with  $N = 10000$  on CIFAR-10 and ImageNet. See the caption of Tables 10-11 for further details.

| Attack            | M  | ASR <sub>24</sub> | ASR <sub>50</sub> | ASR <sub>100</sub> | q <sub>24</sub> | s <sub>24</sub> | VRAM | M  | ASR <sub>100</sub> | ASR <sub>150</sub> | q <sub>100</sub> | s <sub>100</sub> | VRAM |
|-------------------|----|-------------------|-------------------|--------------------|-----------------|-----------------|------|----|--------------------|--------------------|------------------|------------------|------|
| Sparse-RS         | C3 | 41.12             | 63                | 83.99              | 3.44            | 12.82           | 0.60 | I2 | 87.2               | 88.3               | 9.66             | 3.67             | 0.14 |
| sPGD <sub>u</sub> |    | 37.95             | 72.6              | 98.59              | 1.99            | 12.56           | 0.65 |    | 86.9               | 91.6               | 7.84             | 1.95             | 0.15 |
| sPGD <sub>p</sub> |    | 35.89             | 67.92             | 97.42              | 2.12            | 13.2            | 0.65 |    | 81.8               | 88.9               | 8.4              | 3.85             | 0.15 |
| $\sigma$ -zero    |    | <b>41.67</b>      | <b>76.38</b>      | <b>99.01</b>       | 0.33            | 3.07            | 2.41 |    | <b>95.1</b>        | <b>97.2</b>        | 1.31             | 0.23             | 0.21 |

## C VISUAL COMPARISON

In Figures 8-10 we show adversarial examples generated with competing  $\ell_0$ -attacks, and our  $\sigma$ -zero. First, we can see that  $\ell_0$  adversarial perturbations are clearly visually distinguishable [Carlini & Wagner (2017a); Brendel et al. (2019a); Pintor et al. (2021)]. Their goal, indeed, is not to be indistinguishable to the human eye – a common misconception related to adversarial examples [Biggio & Roli, 2018; Gilmer et al., 2018] – but rather to show whether and to what extent models can be fooled by just changing a few input values.

A second observation derived from Figures 8-10 is that the various attacks presented in the state of the art can identify distinct regions of vulnerability. For example, note how FMN and VFGA find similar perturbations, as they mostly target overlapping regions of interest. Conversely, EAD finds sparse perturbations scattered throughout the image but with a lower magnitude. This divergence is attributed to EAD’s reliance on an  $\ell_1$  regularizer, which promotes sparsity, thus diminishing perturbation magnitude without necessarily reducing the number of perturbed features. Conversely, our attack does not focus on specific areas or patterns within the images but identifies diverse critical features, whose manipulation is sufficient to mislead the target models. Given the diverse solutions offered by the attacks, we argue that their combined usage may still improve adversarial robustness evaluation to sparse attacks.

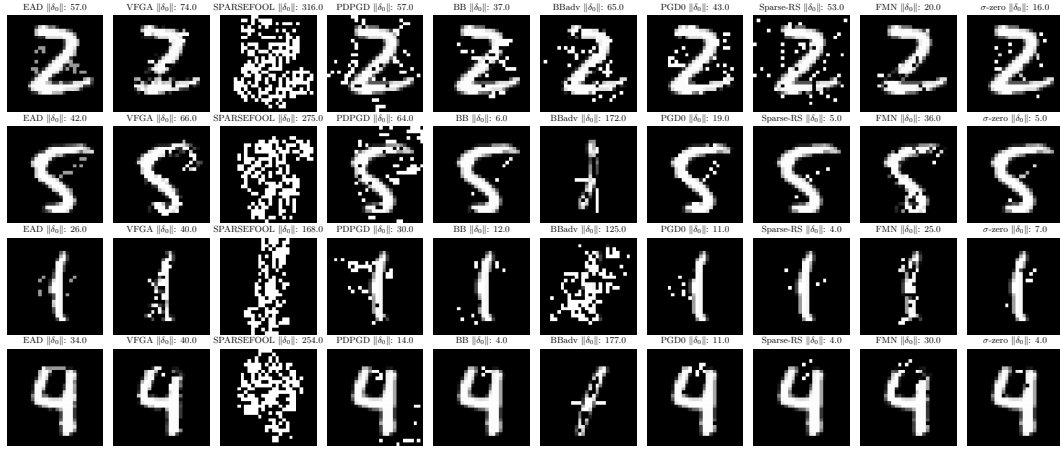

Figure 8: Randomly chosen adversarial examples from MNIST M2.

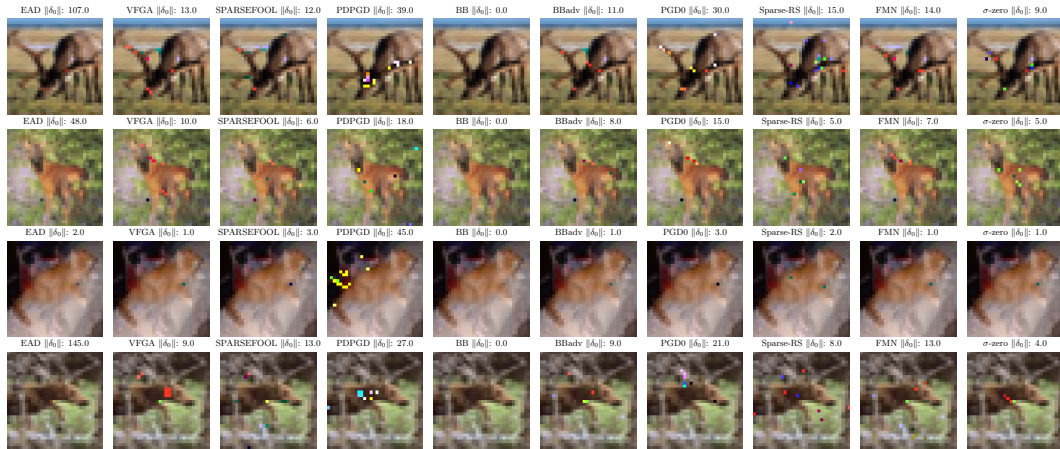

Figure 9: Randomly chosen adversarial examples from CIFAR-10 C1.

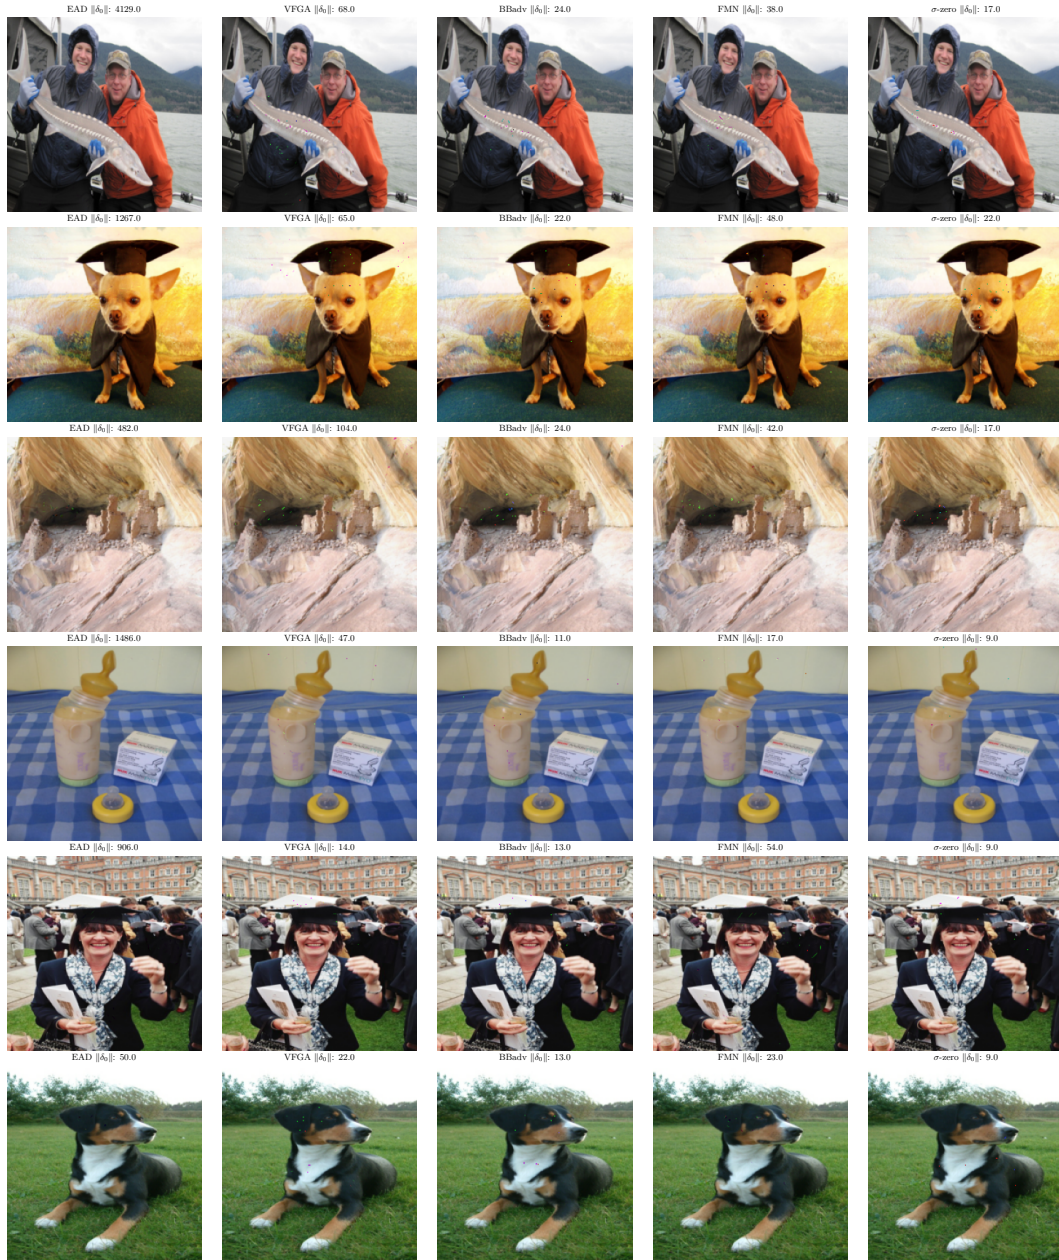

Figure 10: Randomly chosen adversarial examples from ImageNet I1.
